# Supplementary material
Source: Springer Nature journal article supplement (https://www.springermedizin.de/resource/supplementary/12985_2009_781_MOESM2_ESM.pdf/9609148)

# Hours after transfection

0

24

48

72

96

A

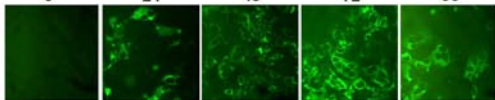

B

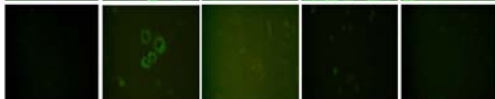

C

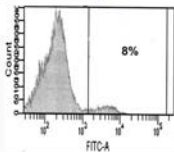

D

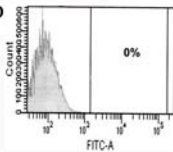

Supplement: MOESM2 [file 9609148]
